# Supplementary material for: Incisions and Decisions: Impact of Operative Involvement on Medical Student Interest and Career Perceptions
Source: Research Square preprint supplement (doi:10.21203/rs.3.rs-7473302/v1), 2025-10-15
Supplement: Supplementary file 1 [file 8ffd215cbbd4db048ada254d.pdf]

**INCISIONS AND DECISIONS: IMPACT OF OPERATIVE INVOLVEMENT ON MEDICAL  
STUDENT INTEREST AND CAREER PERCEPTIONS**

Alice Qian, BS<sup>1\*</sup>; Daniel Chen, BA<sup>1</sup>; AJ Haas, MD, MMSc<sup>2</sup>; Angela Thelen, MD<sup>2</sup>; Kevin El-Hayek, MD,  
MBA, FACS<sup>1,2</sup>

<sup>1</sup>Case Western Reserve University School of Medicine, Cleveland, OH, USA

<sup>2</sup>Department of Surgery, The MetroHealth System, Cleveland OH, USA

\*Indicates corresponding author:

Health Education Campus, 9501 Euclid Ave, Cleveland, OH 44106

afq3@case.edu

(412) 953-0620

**Acknowledgements:** The authors have no acknowledgements to declare.

## Default Question Block

Consent: Your participation is voluntary for this two minute survey. This is an **anonymous** survey and we will not collect any clear identifiers like your name or address.

Alice Qian, MS3

Kevin El-Hayek, MD, MBA, FACS, Associate Professor of Surgery

Case Western Reserve University School of Medicine

If you **consent** to take part, please continue to the **eight question** survey. If you do **not** consent to taking part, please exit your browser window.

What services were you on for core rotation?

- ☐ EGS/ACS
- ☐ Vascular
- ☐ Blue Team (Surgical Oncology/Minimally Invasive/Bariatric Surgery/Endoscopic Surgery)
- ☐ Green Team (Colorectal/Endocrine/MIS)

Please rate from a scale of 1-5 your satisfaction of scrub in frequency during your core rotation.

- ☐ 1- extremely dissatisfied (not enough)
- ☐ 2- dissatisfied
- ☐ 3- just right/neutral
- ☐ 4- a bit much for comfort
- ☐ 5- too much

How many times did you scrub in on average per week?

1      2      3      4      5      6      7      8      9      10

Times

Check if these applied to your participation in your core rotation:

- ☐ Scrubbed 10+ times per week at times

- ☐ Limited and dissatisfied involvement when scrubbed in (for example: just port site closure)
- ☐ Scrubbed in on weekends
- ☐ Scrubbed in almost daily

Interest in surgical specialty **before** surgery rotation:

0 1 2 3 3 4 5

0- not at all, 5- only  
something surgical

Interest in surgical specialty **after** surgery rotation:

0 1 2 3 4 5

0- not at all, 5- only  
something surgical

Lastly, please check any OTHER factors that increased or decreased your interest in surgery after your core experience:

- ☐ Faculty engagement
- ☐ Resident engagement
- ☐ OR atmosphere
- ☐ "Pimping" or intraoperative assessments
- ☐ Work hours
- ☐ Patient population/pathology
- ☐ Feedback/performance in rotation
- ☐ Shelf/learning materials
- ☐ Curriculum Didactics
- ☐ Hospital resources
- ☐ Wellness/lifestyle
- ☐ Types of surgical operations viewed/involved in

Any other comments:
